# Supplementary material for: Comparison of coproprevalence and seroprevalence to guide decision-making in national soil-transmitted helminthiasis control programs: Ethiopia as a case study
Source: PubMed Central journal article supplement (PMC9534397; doi:10.1371/journal.pntd.0010824), 2022-10-05

# S1 Info Maps of Ethiopian sentinel schools selected for this study

Maps were made using QGIS (version 3.16.16) (<https://qgis.org/en/site/>). The base layer image was obtained from OpenStreetMap (<http://www.openstreetmap.org>) which is made available under the Open Data Commons Open Database License (<https://www.openstreetmap.org/copyright>). The source of the administrative boundaries was [www.gadm.org/](http://www.gadm.org/).

A

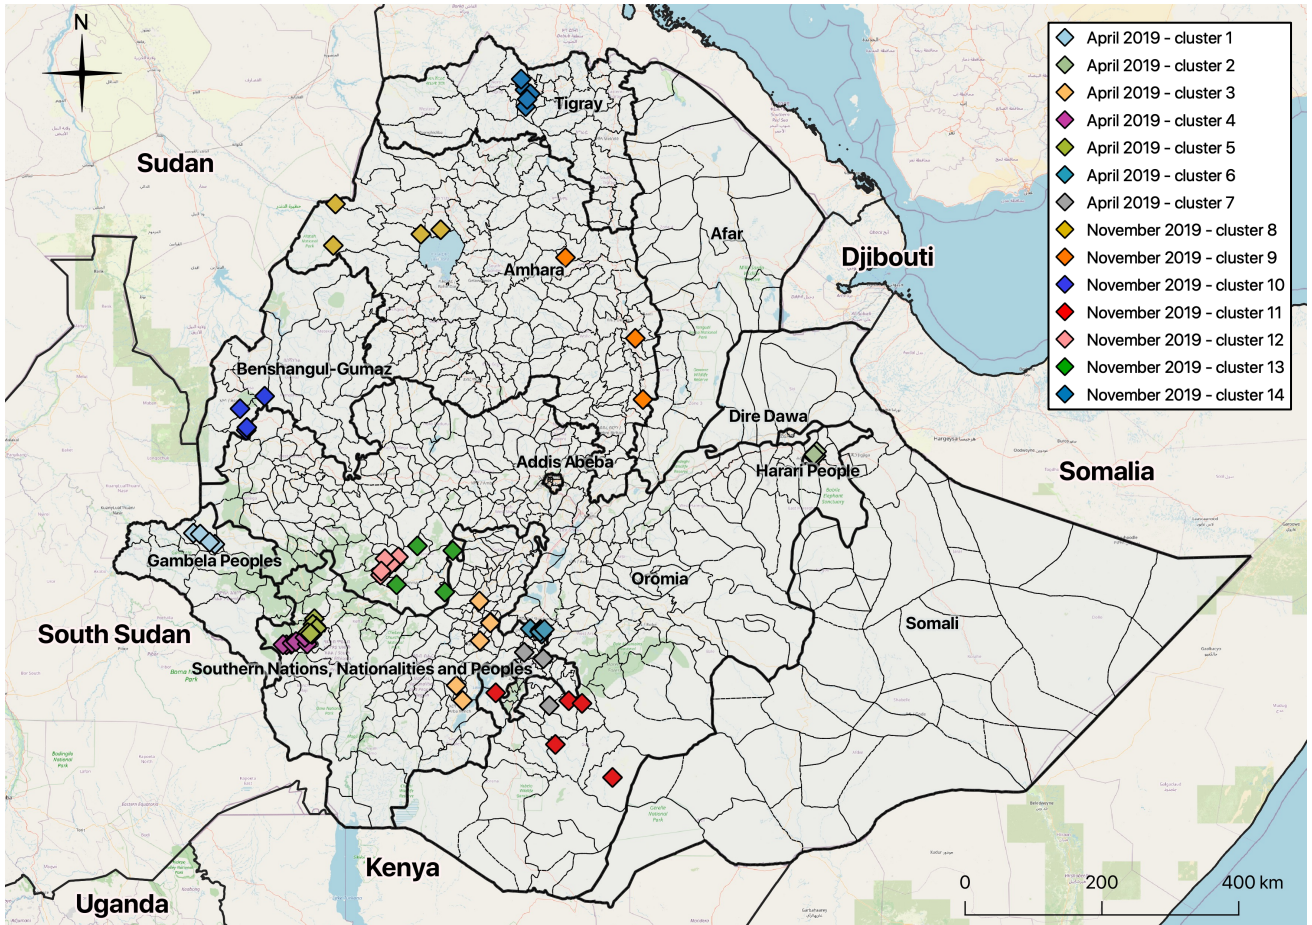

B

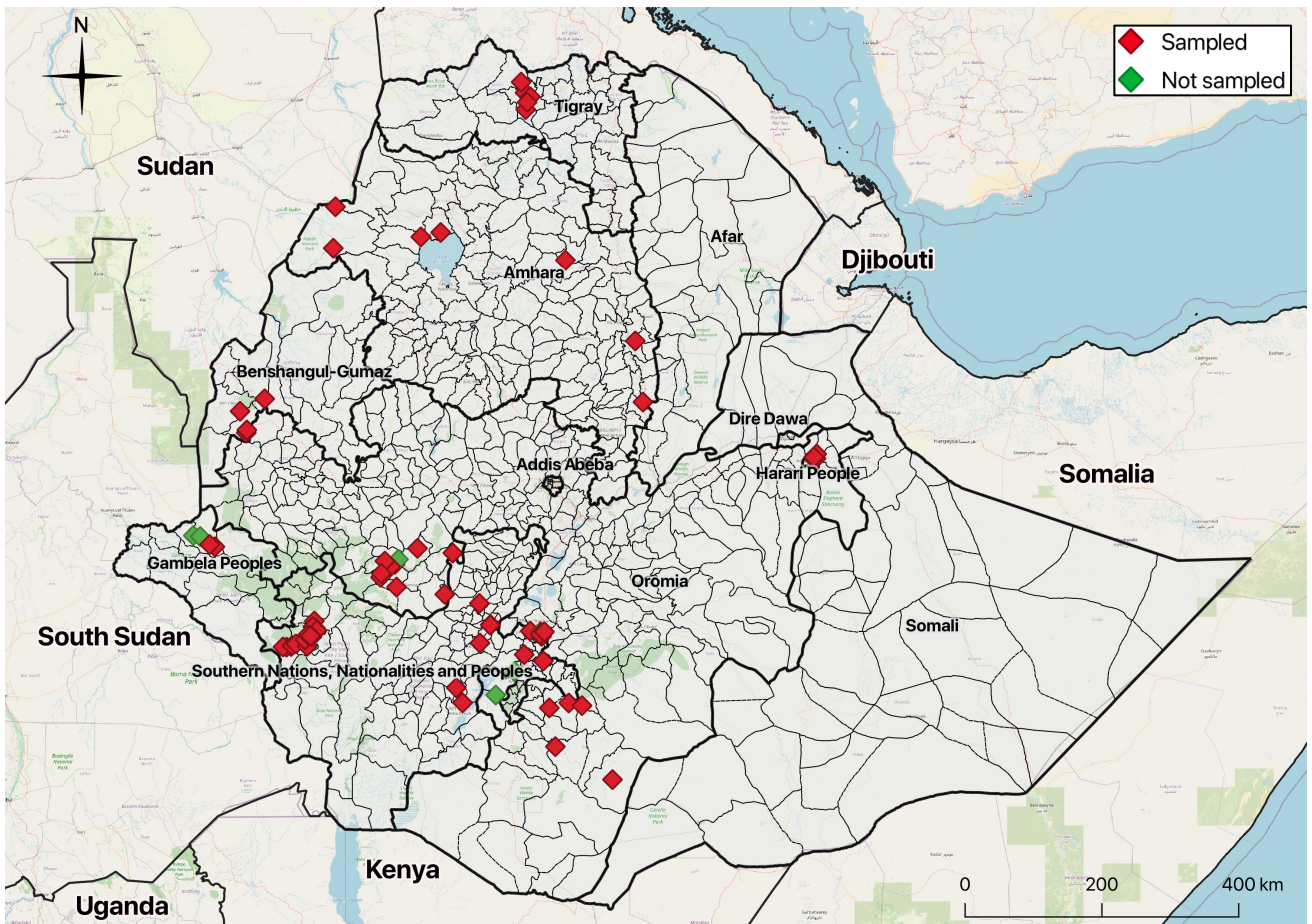

Supplement: pntd.0010824.s001.pdf [file pntd.0010824.s001.pdf]
