# Supplementary material for: Comparison of coproprevalence and seroprevalence to guide decision-making in national soil-transmitted helminthiasis control programs: Ethiopia as a case study
Source: PubMed Central journal article supplement (PMC9534397; doi:10.1371/journal.pntd.0010824), 2022-10-05

**S4 Info**

**Relationship between mean fecal egg count of infected individuals and coproprevalence observed in the present survey for both *Ascaris* (panel A) and *Trichuris* (panel B)**

**A**

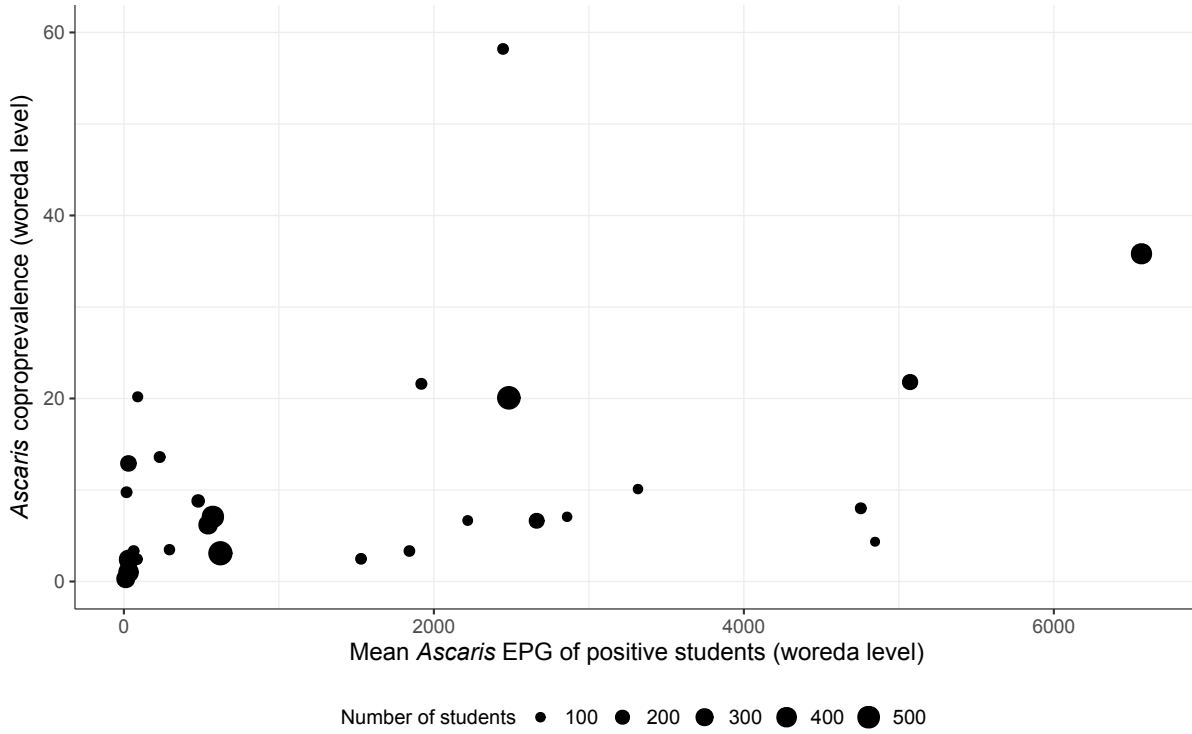

**B**

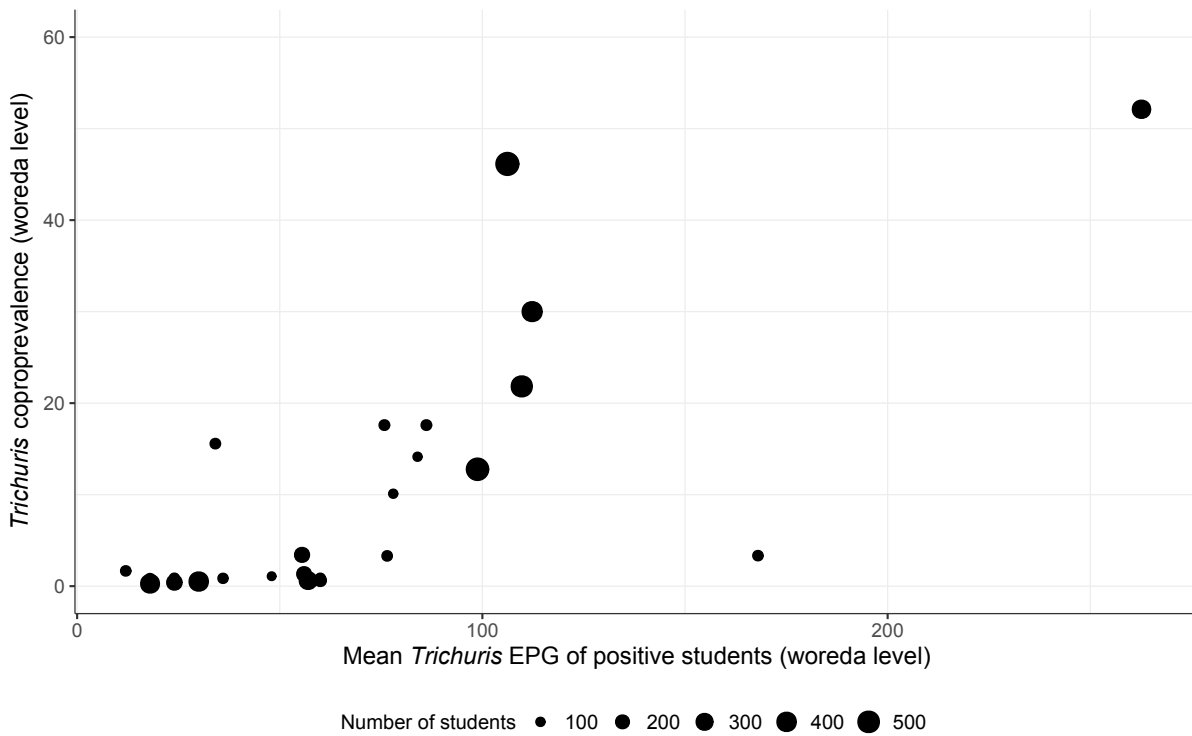

Supplement: pntd.0010824.s004.pdf [file pntd.0010824.s004.pdf]
