# Supplementary material for: Comparison of coproprevalence and seroprevalence to guide decision-making in national soil-transmitted helminthiasis control programs: Ethiopia as a case study
Source: PubMed Central journal article supplement (PMC9534397; doi:10.1371/journal.pntd.0010824), 2022-10-05

### S5 Info

Correlation between any STH coprevalence and mean ODr on woreda level

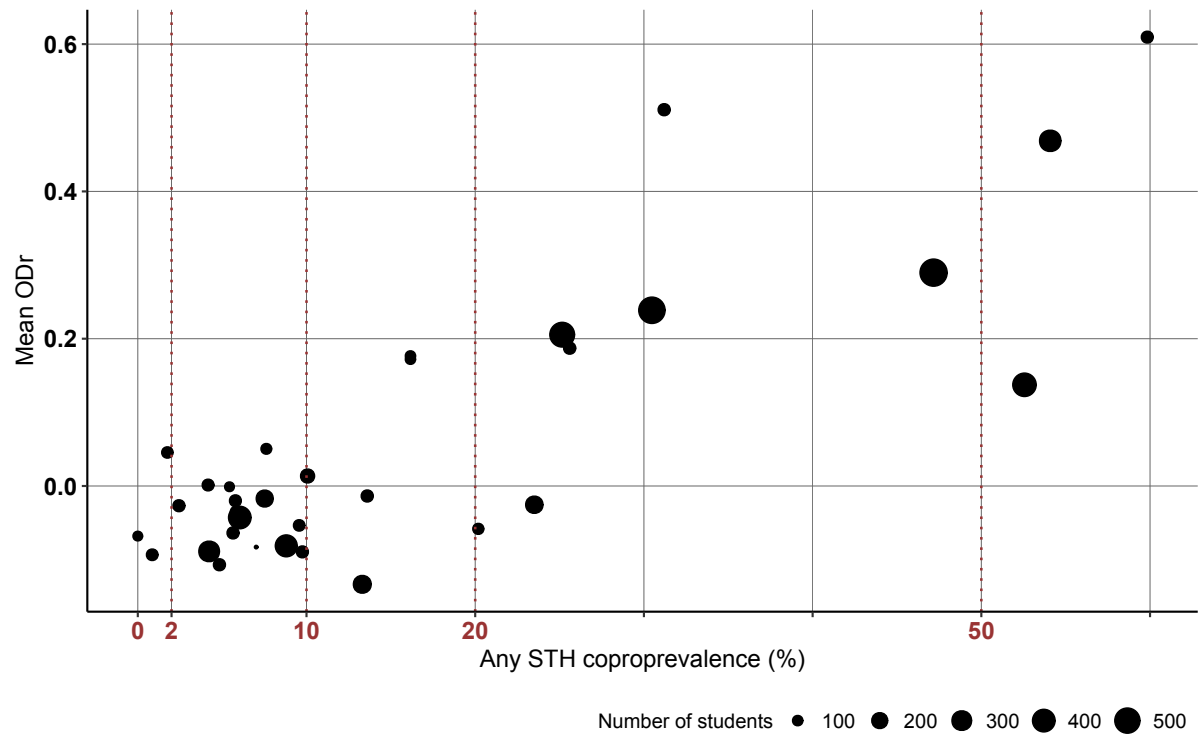

Supplement: pntd.0010824.s005.pdf [file pntd.0010824.s005.pdf]
