# Supplementary material for: Comparison of coproprevalence and seroprevalence to guide decision-making in national soil-transmitted helminthiasis control programs: Ethiopia as a case study
Source: PubMed Central journal article supplement (PMC9534397; doi:10.1371/journal.pntd.0010824), 2022-10-05

**S6 Info**

**Correlation between *Schistosoma mansoni* coprovalence and seroprevalence on woreda level**

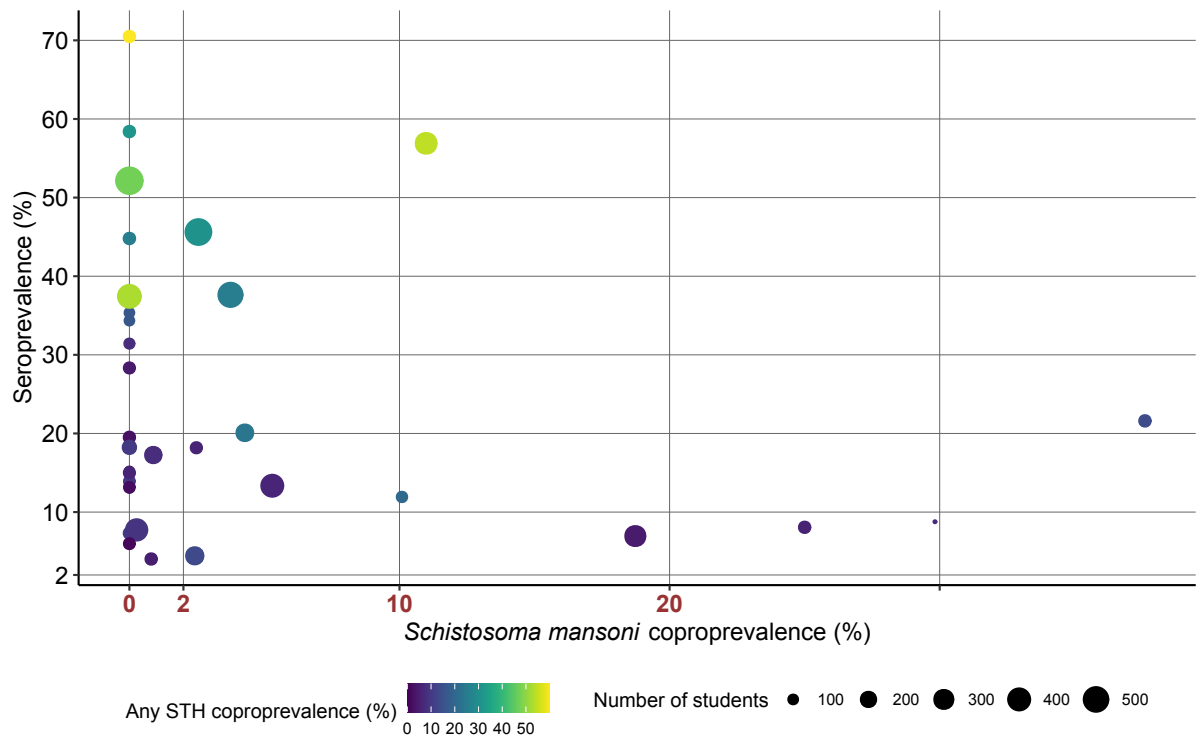

Supplement: pntd.0010824.s006.pdf [file pntd.0010824.s006.pdf]
